# Supplementary material
Source: publisher site journal article supplement (https://www.dovepress.com/article/442379)
Supplement: Supplementary file 1 [file get_supplementary_file.php]

Table S1 Primers used for reverse transcription-quantitative polymerase chain reaction.

| lncRNA | primer | Sequence |
| --- | --- | --- |
| β-actin | Forward | CCAAGCAGCATGAAGATCAA |
|  | Reverse | TCTGCTGGAAGGTGCTGAG |
| FXYD2 | Forward | CTATGAGACCGTTCGCAATGGG |
|  | Reverse | CTGCTGTTACGGCTCATCTTCAT |
| MPZL1 | Forward | GAGTCTGCCTTCTGGATCTCAC |
|  | Reverse | TCCGCATACACCACAGACTCTG |
| PAH | Forward | CATTGGTGCCACTGTCCATGAG |
|  | Reverse | TCAGCATCCAGTTCCGCTCCAT |
